# Supplementary material for: Snapshot of the Probiotic Potential of Kluveromyces marxianus DMKU-1042 Using a Comparative Probiogenomics Approach
Source: MDPI journal article supplement (doi:10.3390/foods12234329), 2023-11-30
Supplement: s1 [file s1]

**Supplementary Table S1: Source information, and general genome features of *Kluyveromyces marxianus* strains**

| <i>WGS</i>             | Strains     | BioSample    | No of contigs | Contig N50(Mb) | Contig L50 | Isolation source          | Region       | GC Content (%) | Submitter                                                        | Year | Sequencing platform    |
|------------------------|-------------|--------------|---------------|----------------|------------|---------------------------|--------------|----------------|------------------------------------------------------------------|------|------------------------|
| <b>BBIL00000000</b>    | DMB1        | SAMD00017758 | 36            | 1.4            | 4          | Sugarcane                 | Japan        | 40.09          | National Institute of Advanced Industrial Science and Technology | 2014 | PacBio RS II           |
| <b>LDJA00000000</b>    | IIPE453     | SAMN01103505 | 707           | 0.0353         | 93         | Sugar mill waste          | India        | 40.17          | CSIR-Indian Institute of Petroleum                               | 2012 | Illumina NextSeq       |
| <b>LDJA00000000</b>    | UFS-Y2791   | SAMN04590183 | 1088          | 0.0213         | 159        | Agave plant               | South Africa | 40.04          | University of the Free State                                     | 2007 | Illumina HiSeq         |
| <b>CP015054</b>        | FIM1        | SAMN04601176 | 8             | 1.4            | 4          | Yogurt                    | China        | 40.16          | Fudan university                                                 | 2016 | Illumina Hiseq 2000    |
| <b>CP023456</b>        | NRRL Y-6860 | SAMN06013971 | 9             | 1.4            | 4          | Banana alcoholic beverage | Ecuador      | 40.20          | J. Craig Venter Institute                                        | 1971 | PacBio                 |
| <b>CP015054</b>        | LHW-O       | SAMN06765481 | 480           | 0.0401         | 88         | Onion                     | South Korea  | 40.15          | World Institute of Kimchi                                        | 2016 | Illumina MiSeq         |
| <b>CP015054</b>        | L03         | SAMN12504567 | 262           | 0.0694         | 52         | Dairy                     | Ireland      | 40.13          | Wolfe Lab, Conway Institute, University College Dublin           | 2019 | Illumina HiSeq         |
| <b>CP015054</b>        | Olga-2      | SAMN08581128 | 1154          | 0.0182         | 74         | Kefir                     | Germany      | 40.19          | SysMilk                                                          | 2016 | Illumina HiSeq         |
| <b>PUHV00000000</b>    | Olga-1      | SAMN08581126 | 973           | 0.0201         | 147        | kefir                     | Germany      | 40.13          | Chalmers University of Technology                                | 2016 | Illumina HiSeq         |
| <b>JAKGCN000000000</b> | KM3         | SAMN24619240 | 20            | 1.0            | 4          | Tibetan kefir             | China        | 40.21          | Technology Center of Bright Dairy & Food Co., Ltd, China         | 2012 | Illumina HiSeq; PacBio |

|                        |                |              |     |        |   |                       |        |       |                                                                                      |           |                           |
|------------------------|----------------|--------------|-----|--------|---|-----------------------|--------|-------|--------------------------------------------------------------------------------------|-----------|---------------------------|
| <b>AP014599</b>        | NBRC1777       | SAMD00017339 | 8   | 1.4    | 4 | -                     | Japan  | 40.12 | Organization of Advanced Science and Technology, Kobe University                     | 2014      | PacBio RS II; Ion Torrent |
| <b>CP067318</b>        | CBS6556        | SAMN17225432 | 8   | 1.4    | 4 | Fermented maize dough | Mexico | 40.21 | Delft University of Technology                                                       | 1971      | Oxford Nanopore MinION    |
| <b>JAIRBU000000000</b> | SLP1           | SAMN18296546 | 38  | 0.3689 | 9 | fermentation tanks    | Mexico | 39.5  | Centro de Investigacion y Asistencia en Tecnologia y Diseno del Estado de Jalisco AC | 2009/2010 | PacBio RSII               |
| <b>AKFM000000000</b>   | KCTC1755       | SAMN02981417 | 111 | 1.2    | 4 | Pozol                 | Mexico | 40.14 | Korea Research Institute of Bioscience and Biotechnology                             | 2014      | Illumina GAIIx            |
| <b>AP012213</b>        | DMKU3-1042_GCF | SAMD00067077 | 8   | 1.4    | 4 | Budding yeast         | Japan  | 40.12 | Yamaguchi University                                                                 | 2014      | Sanger ABI3730            |

**Supplementary Table S2. Amino acids and their putative functions detected in the *K. marxianus* DMKU3-1042 isolates.**

| <b>Amino acids</b>                                | <b>Putative functions</b>                                                                                                                                                                                                                                                                                                                                                                                                                        |
|---------------------------------------------------|--------------------------------------------------------------------------------------------------------------------------------------------------------------------------------------------------------------------------------------------------------------------------------------------------------------------------------------------------------------------------------------------------------------------------------------------------|
| <b>Lysine, threonine, methionine and cysteine</b> | homoserine kinase<br>homoserine dehydrogenase<br>aspartokinase<br>Aspartate-semialdehyde dehydrogenase<br>threonine synthase<br>S-methyl-5-thioribose-1-phosphate isomerase<br>homocysteine S-methyltransferase<br><br>2,3-diketo-5-methylthiopentyl-1-phosphate<br>enolase-phosphatase<br>Methylthioribulose-1-phosphate dehydratase<br><br>5'-methylthioadenosine phosphorylase<br><br>1,2-dihydroxy-3-keto-5-methylthiopentene<br>dioxygenase |
| <b>Histidine metabolism</b>                       | Imidazoleglycerol-phosphate dehydratase<br><br>Histidinol-phosphate aminotransferase<br><br>Imidazole glycerol phosphate synthase<br><br>Adenylosuccinate synthetase<br><br>Phosphoribosylformimino-5-aminoimidazole<br>carboxamide ribotide isomerase                                                                                                                                                                                           |
| <b>Aromatic amino acids and derivatives</b>       | Prephenate dehydratase<br><br>Chorismate mutase III<br><br>Prephenate and/or arogenate dehydrogenase<br><br>Phosphoribosylanthranilate isomerase                                                                                                                                                                                                                                                                                                 |

|                                                             |                                                                                                                                                                                                                                                                                                                                                                             |
|-------------------------------------------------------------|-----------------------------------------------------------------------------------------------------------------------------------------------------------------------------------------------------------------------------------------------------------------------------------------------------------------------------------------------------------------------------|
|                                                             | <p>Tryptophan synthase beta chain</p> <p>Anthranilate synthase</p>                                                                                                                                                                                                                                                                                                          |
| <b>Proline and 4-hydroxyproline</b>                         | <p>Gamma-glutamyl phosphate reductase</p> <p>Glutamate-5-kinase</p> <p>pyrroline-5-carboxylate reductase</p> <p>NADP-specific glutamate dehydrogenase</p> <p>delta-1-pyrroline-5-carboxylate dehydrogenase</p> <p>Argininosuccinate synthase</p> <p>argininosuccinate lyase</p> <p>ornithine aminotransferase</p> <p>N-acetylornithine aminotransferase</p> <p>Arginase</p> |
| <b>Alanine, serine and glycine</b>                          | <p>phosphoserine aminotransferase</p> <p>aminomethyltransferase</p> <p>glycine dehydrogenase</p> <p>glycine cleavage system H protein</p>                                                                                                                                                                                                                                   |
| <b>Glutamine, glutamate, aspartate, asparagine, ammonia</b> | <p>Aspartokinase</p> <p>homoserine dehydrogenase</p> <p>Glutamine synthetase type II</p> <p>NAD-specific glutamate dehydrogenase</p> <p>NADP-specific glutamate dehydrogenase</p> <p>Aspartate-semialdehyde dehydrogenase</p>                                                                                                                                               |
| <b>Arginine; urea cycle, creatine and polyamines</b>        | <p>N-acetylglutamate kinase</p> <p>argininosuccinate lyase</p> <p>ornithine carbamoyltransferase</p> <p>Glutamate N- acetyltransferase</p> <p>Spermidine synthase</p> <p>Arginase</p> <p>Argininosuccinate synthase</p>                                                                                                                                                     |
